# Supplementary material
Source: publisher site journal article supplement (https://www.dovepress.com/get_supplementary_file.php?f=335549.docx)
Supplement: Supplementary file 1 [file get_supplementary_file.php]

**SEM/EDX analysis**


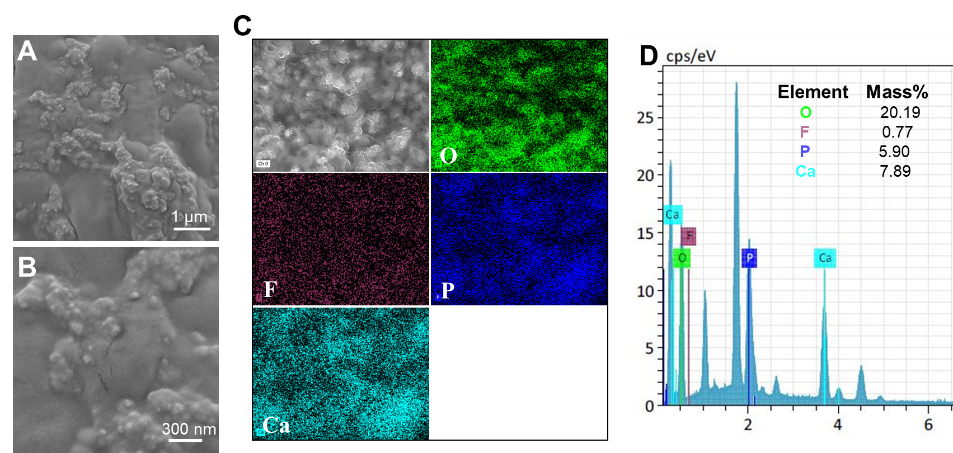


**Figure S1** A, B) SEM images of GC Tooth Mousse Plus. B: is a magnified picture of a region from A.

C) EDX mapping and (D) EDX spectra of GC Tooth Mousse Plus.

**pH buffering capacity of GC** **Tooth Mousse Plus®**

The 500 mg of GC Tooth Mousse Plus was individually immersed in 20 ml of artificial saliva at pH 4.5 (AS4.5) and at pH 7 (AS7). The pH value of immersion solution was monitored by a FiveEasy Plus pH meter (Mettler Toledo) at 0, 2, 4, 8, 12 and 24 h.


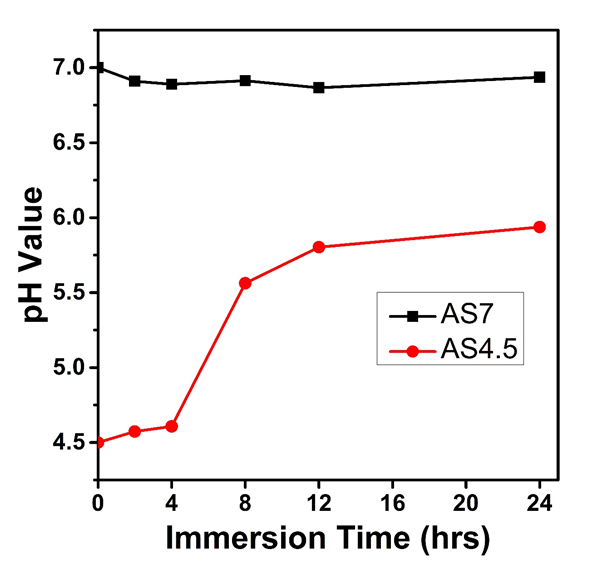


**Figure S2** pH buffering capacity of the GC Tooth Mousse Plus upon immersion in AS4.5 and AS7. Abbreviation: AS4.5, artificial saliva at pH 4.5; AS7, artificial saliva at pH 7.0.

**F ion release measurement**

The 500 mg of GC Tooth Mousse Plus was immersed in 20 ml of NaCl solution (133 mmol/L) buﬀered with 50 mmol/L HEPES (pH=7.0, 37 ºC).35 The concentration of F ions released from the Tooth Mousse was measured at 0, 2, 4, 8, 12 and 24 h. The rest of the analysis proceeds as before.


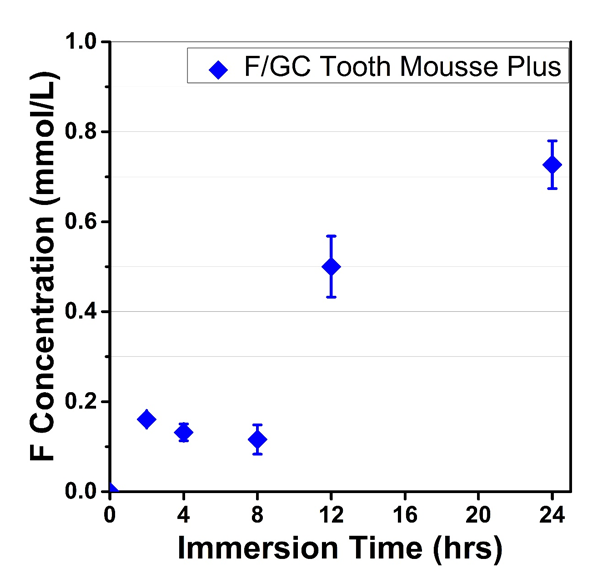


**Figure S3** F ion release potential of GC Tooth Mousse Plus when immersed in buffered sodium

chloride solution (133 mmol/L, pH 7.0).
